# Supplementary material for: Gut Microbial Dysbiosis Associated with Type 2 Diabetes Aggravates Acute Ischemic Stroke
Source: PubMed Central journal article supplement (PMC8693450; doi:10.1128/msystems.01304-21), 2021-12-21
Supplement: reviewer-comments.pdf [file reviewer-comments.pdf]

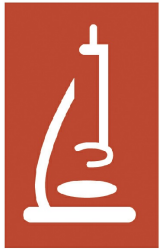

AMERICAN  
SOCIETY FOR  
MICROBIOLOGY

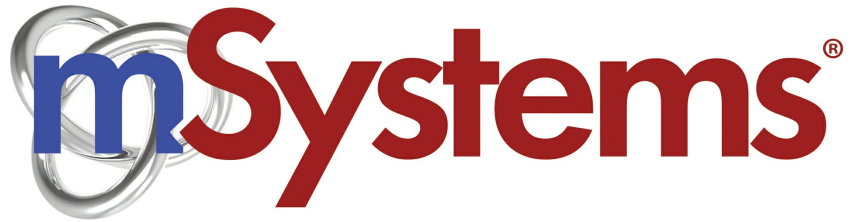

# Gut microbial dysbiosis associated with type 2 diabetes aggravates acute ischemic stroke

Xiaojiao Chen, Qiheng Wu, Xuxuan Gao, Huidi Wang, Jiajia Zhu, Genghong Xia, Yan He, Wei Song, and Kaiyu Xu

*Corresponding Author(s): Kaiyu Xu, Southern Medical University*

---

## Review Timeline:

Submission Date:

November 2, 2021

Accepted:

December 6, 2021

---

*Editor: Joshua Elias*

*Reviewer(s): Disclosure of reviewer identity is with reference to reviewer comments included in decision letter(s). The following individuals involved in review of your submission have agreed to reveal their identity: Xiaoquan Su (Reviewer #1)*

## Transaction Report:

(Note: With the exception of the correction of typographical or spelling errors that could be a source of ambiguity, letters and reports are not edited. The original formatting of letters and referee reports may not be reflected in this compilation.)

**DOI:** <https://doi.org/10.1128/mSystems.01304-21>

December 6, 2021

Dr. Kaiyu Xu  
Southern Medical University  
Guangzhou  
China

Re: mSystems01304-21 (Gut microbial dysbiosis associated with type 2 diabetes aggravates acute ischemic stroke)

Dear Dr. Kaiyu Xu:

Your manuscript has been accepted, and I am forwarding it to the ASM Journals Department for publication. For your reference, ASM Journals' address is given below. Before it can be scheduled for publication, your manuscript will be checked by the mSystems senior production editor, Ellie Ghatineh, to make sure that all elements meet the technical requirements for publication. She will contact you if anything needs to be revised before copyediting and production can begin. Otherwise, you will be notified when your proofs are ready to be viewed.

As an open-access publication, mSystems receives no financial support from paid subscriptions and depends on authors' prompt payment of publication fees as soon as their articles are accepted.

**Publication Fees:**

You will be contacted separately about payment when the proofs are issued; please follow the instructions in that e-mail. Arrangements for payment must be made before your article is published. For a complete list of **Publication Fees**, including supplemental material costs, please visit our [website](#).

Corresponding authors may [join or renew ASM membership](#) to obtain discounts on publication fees. Need to upgrade your membership level? Please contact Customer Service at [Service@asmusa.org](mailto:Service@asmusa.org).

**For mSystems research articles**, you are welcome to submit a short author video for your recently accepted paper. Videos are normally 1 minute long and are a great opportunity for junior authors to get greater exposure. Importantly, this video will not hold up the publication of your paper, and you can submit it at any time.

Details of the video are:

- Minimum resolution of 1280 x 720
- .mov or .mp4. video format
- Provide video in the highest quality possible, but do not exceed 1080p
- Provide a still/profile picture that is 640 (w) x 720 (h) max
- Provide the script that was used

We recognize that the video files can become quite large, and so to avoid quality loss ASM suggests sending the video file via <https://www.wetransfer.com/>. When you have a final version of the video and the still ready to share, please send it to Ellie Ghatineh at [eghatineh@asmusa.org](mailto:eghatineh@asmusa.org).

Thank you for submitting your paper to mSystems.

Sincerely,

Joshua Elias  
Editor, mSystems

Journals Department  
American Society for Microbiology  
1752 N St., NW  
Washington, DC 20036  
E-mail: [peerreview@asmusa.org](mailto:peerreview@asmusa.org)  
Phone: 1-202-942-9338

FIG S2: Accept  
FIG S1: Accept
